# Supplementary material
Source: publisher site journal article supplement (https://www.dovepress.com/article/335293)
Supplement: Supplementary file 1 [file get_supplementary_file.php]

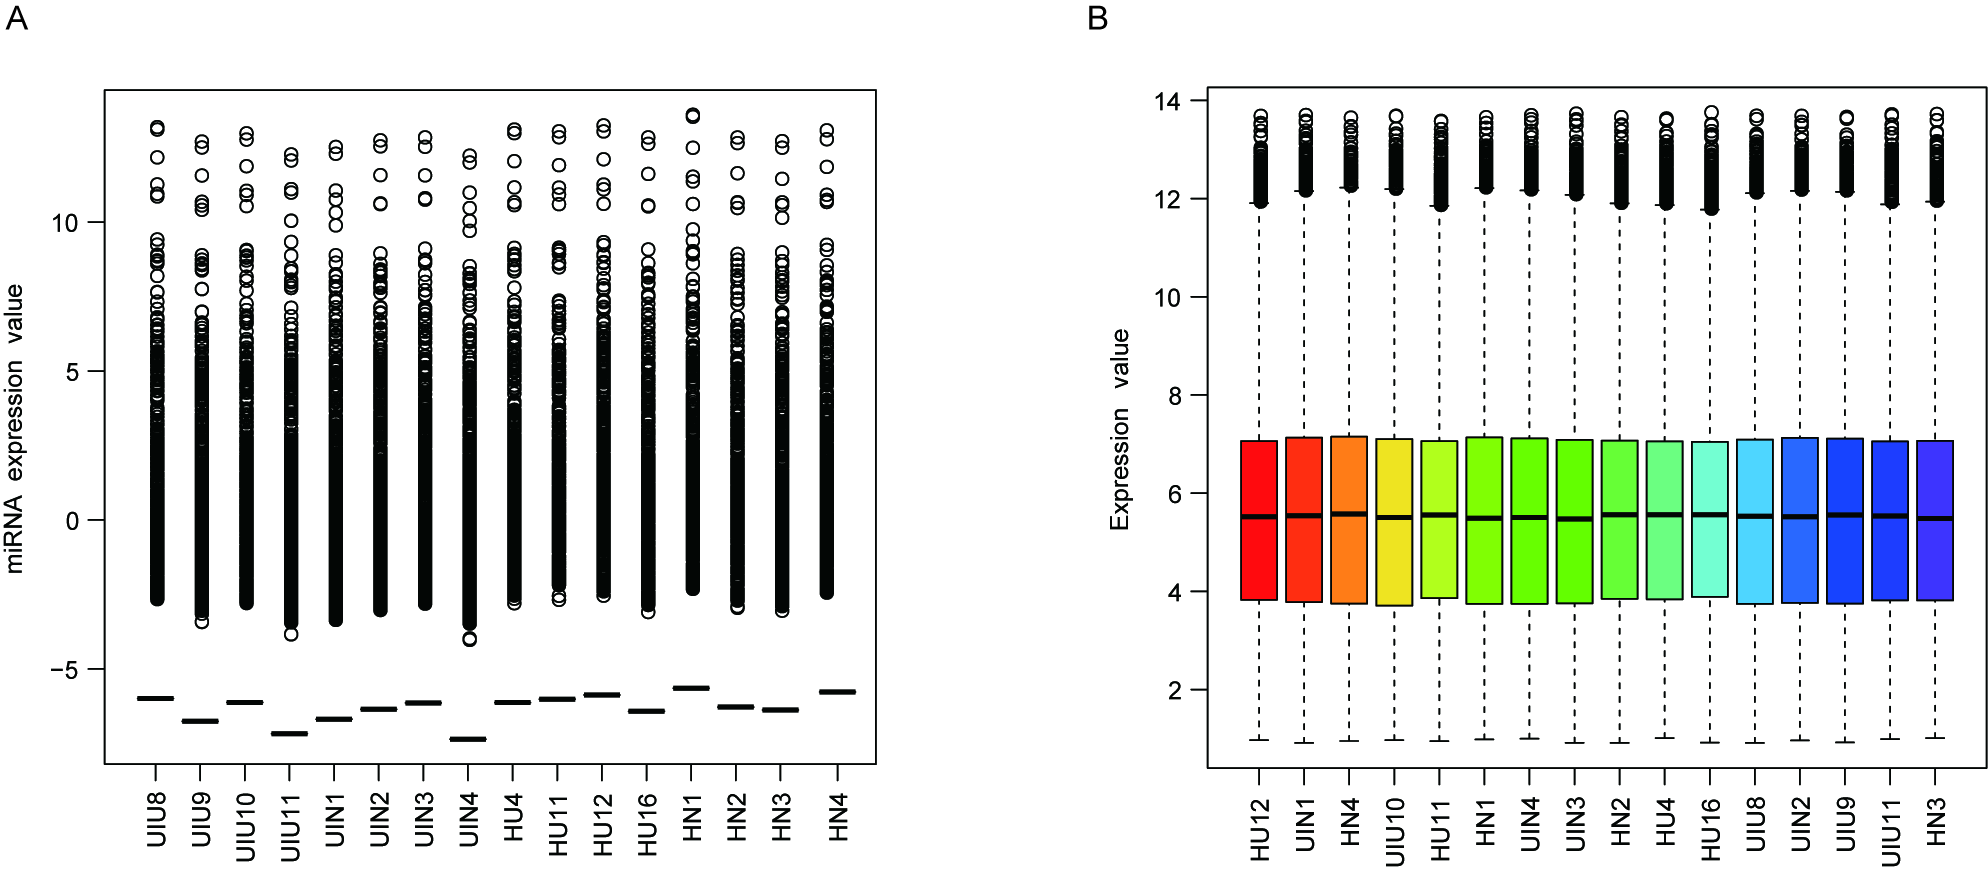


**Figure S1 Normalized data of miRNA and mRNA. (A)** The expression box plot of normalized miRNA data of 16 samples. The x-axis represented sample and the y-axis represented relative expression of miRNA. **(B)** The expression box plot of normalized mRNA data of 16 samples. The x-axis represented sample and the y-axis represented relative expression of mRNA.


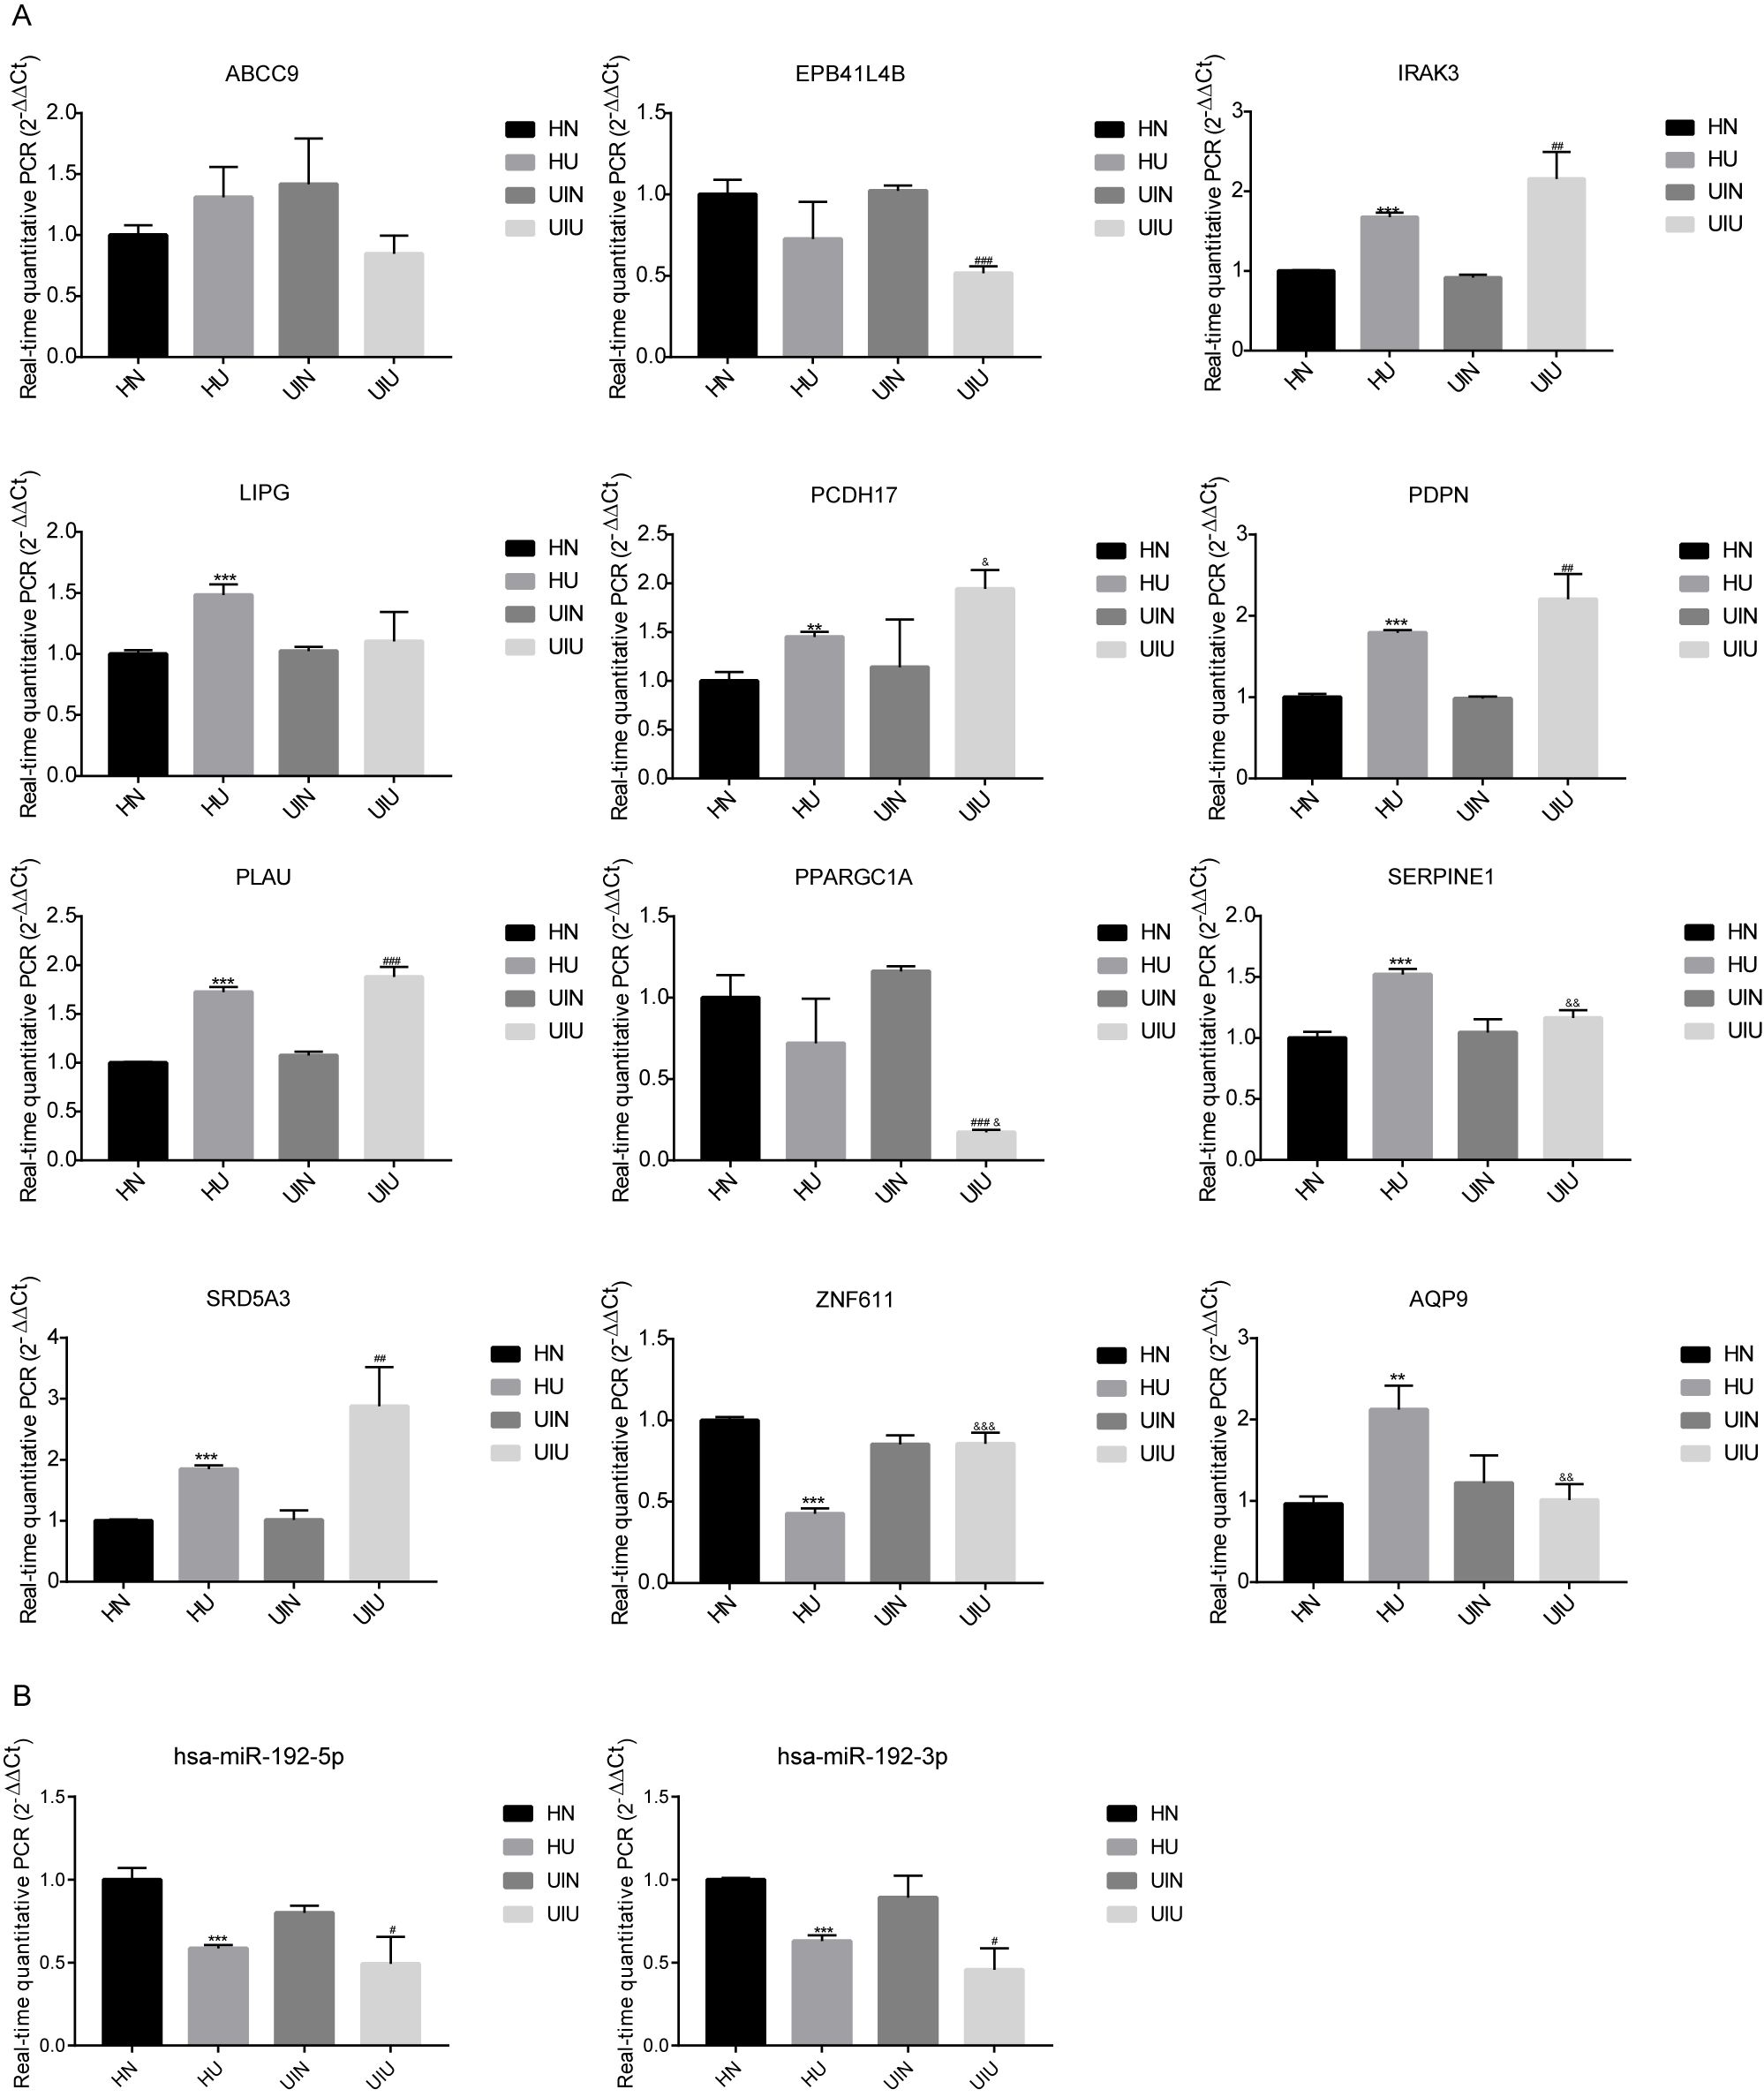


**Figure S2**. The relative mRNAs and miRNAs expression level in four groups. **(A)** mRNA; **(B)** miRNA. ** P < 0.01, *** P < 0.001 vs. HN group; # P < 0.05, ## P < 0.01, ### P < 0.001 vs. UIN group; & P < 0.05, && P < 0.01, &&& P < 0.001 vs. HU group.

Table S1. The clinical information of participants.
